1 **Auxin regulates endosperm cellularization in *Arabidopsis***

2

3 **Duarte D. Figueiredo<sup>†</sup>, Rita A. Batista<sup>†</sup>, and Claudia Köhler<sup>\*</sup>**

4 Department of Plant Biology, Uppsala BioCenter, Swedish University of Agricultural Sciences and

5 Linnean Center for Plant Biology, Uppsala, Sweden

6 <sup>†</sup>Both authors contributed equally to this work

7 <sup>\*</sup>Corresponding Author ([claudia.kohler@slu.se](mailto:claudia.kohler@slu.se))

8 **Abstract**

9 The endosperm is an ephemeral tissue serving as nutrient source for the developing embryo,  
10 similarly to the placenta in mammals. It is derived after fertilization of the central cell in the  
11 female gametophyte. In most angiosperms the endosperm starts to develop as syncytium, where  
12 nuclear divisions are not followed by cytokinesis. The timing of endosperm cellularization largely  
13 varies between species and the event triggering this transition remains unknown. Here we show  
14 that increased auxin biosynthesis in the endosperm prevents endosperm cellularization, leading  
15 to seed arrest. Auxin overproducing seeds phenotypically resemble paternal excess triploid seeds  
16 derived from hybridizations of diploid maternal plants with tetraploid pollen donors. We  
17 demonstrate that auxin biosynthesis and signaling genes are strongly overexpressed in triploid  
18 seeds, correlating with increased auxin activity. Reduced auxin biosynthesis and signaling can  
19 restore endosperm cellularization in triploid seeds and restore triploid seed viability, highlighting  
20 a causal role of increased auxin levels in preventing endosperm cellularization. We propose that  
21 auxin levels determine the time of endosperm cellularization and uncovered a central role of  
22 auxin in establishing hybridization barriers by changing the timing of endosperm cellularization.

## 23 Introduction

24 In flowering plants seed development is initiated by the fertilization of two maternal gametes,  
25 egg cell and central cell, by two paternal sperm cells (Dresselhaus et al., 2016). This double  
26 fertilization event originates two fertilization products: the embryo, which will form a new plant,  
27 and the endosperm, a nourishing tissue that ensures adequate nutrient transfer from the mother  
28 plant to the developing embryo (Bleckmann et al., 2014). The endosperm of most angiosperms is  
29 a triploid tissue, derived after fertilization of the diploid central cell. It thus contains two maternal  
30 and one paternal (2M:1P) genome copies. In *Arabidopsis*, like in most angiosperms, the  
31 endosperm initially develops as a syncytium, where nuclear divisions are not followed by  
32 cytokinesis (Li and Berger, 2012). After a defined number of nuclear divisions the endosperm  
33 cellularizes (Boisnard-Lorig et al., 2001); however, the pathways regulating this transition remain  
34 unknown. The balance of 2M:1P genome copies in the endosperm is crucial for reproductive  
35 success. Deviation from this ratio in response to hybridizations of plants that differ in ploidy  
36 frequently leads to unviable seeds, a phenomenon referred to as triploid block (Wangenheim,  
37 1962; Scott et al., 1998; Leblanc et al., 2002; Stoute et al., 2012; Sekine et al., 2013). Importantly,  
38 interploidy hybridizations affect endosperm cellularization: while maternal excess crosses ( $4x \times$   
39  $2x$ ; by convention the maternal parent is always mentioned first) shift the cellularization to earlier  
40 timepoints, paternal excess hybridization ( $2x \times 4x$ ) cause a delay or complete failure of endosperm  
41 cellularization (Scott et al., 1998; Lafon-Placette and Kohler, 2016). In *Arabidopsis*, the triploid  
42 ( $3x$ ) embryos resulting from  $2x \times 4x$  crosses are viable and produce healthy plants when  
43 transferred to nutritive medium, revealing that failure of endosperm cellularization impairs  
44 embryo viability (Hehenberger et al., 2012; Lafon-Placette and Kohler, 2016). Mutations in the  
45 paternally-expressed imprinted genes (PEGs) *ADMETOS* (*ADM*), *SUVH7*, *PEG2*, and *PEG9* restore  
46 endosperm cellularization and viability of paternal excess  $3x$  seeds (Kradolfer et al., 2013b; Wolff  
47 et al., 2015; Huang et al., 2017).

48 In this study we show that auxin activity is strongly increased in paternal-excess  $3x$  seeds and  
49 that the  $3x$  seed phenotype can be phenocopied by over-production of auxin in the endosperm  
50 of diploid seeds. Furthermore, we show that down-regulating auxin biosynthesis or signalling can  
51 partly restore  $3x$  seed viability. Overall, our data link auxin activity with endosperm cellularization

52 and show that increased auxin activity in the endosperm establishes a post-zygotic hybridization  
53 barrier in *Arabidopsis*.

## 54 **Results**

### 55 **Paternal-excess crosses lead to increased auxin activity after fertilization**

56 Triploid seed abortion in paternal-excess ( $2x \times 4x$ ) crosses is characterized by the over-  
57 proliferation of the endosperm, which fails to cellularize (Scott et al., 1998), but the molecular  
58 mechanisms that lead to this phenotype are yet to be elucidated. To search for pathways  
59 potentially involved in  $3x$  seed abortion, we compared gene expression data of WT seeds at 6  
60 days after pollination (6 DAP) with that of WT maternal plants pollinated with pollen of *omission*  
61 *of second division 1 (osd1)* (d'Erfurth et al., 2009). Mutants for *osd1* form unreduced diploid  
62 gametes ( $2n$ ) and therefore can be used to mimic paternal-excess crosses when used as a pollen  
63 donor to a WT mother (d'Erfurth et al., 2009; Kradolfer et al., 2013b). We found genes involved  
64 in auxin homeostasis to be significantly enriched among those genes that were upregulated in  $3x$   
65 seeds (Table 1). In particular, genes involved in auxin biosynthesis (*TAA/TAR* and *YUCCA* (Cheng  
66 et al., 2007; Stepanova et al., 2008)), auxin transport (PIN and PGP-type (Lin and Wang, 2005;  
67 Křeček et al., 2009)), and Auxin Response Factors (ARFs (Boer et al., 2014; Weijers and Wagner,  
68 2016)) were highly upregulated in  $3x$  seeds, when compared to  $2x$  seeds (Fig. 1A). Consistent with  
69 the transcriptome data, we found a marked increase in the activity of a transcriptional GFP  
70 reporter for the auxin-responsive gene *GH3.3* (Gutierrez et al., 2012) in  $3x$  seeds (Fig. 1B,C). We  
71 also observed strongly increased activity of the auxin sensor *DR5v2::VENUS* (Liao et al., 2015) in  
72  $3x$  seeds that was most prominent in the seed coat, suggesting that increased auxin generated in  
73 the fertilization products in response to *osd1* pollination is rapidly transported to the seed coat  
74 (Fig. 1D,E). Indeed, genes coding for auxin biosynthesis, as well as auxin signalling, are strongly  
75 up-regulated in the endosperm of  $3x$  seeds compared to that of  $2x$  seeds (Fig. 1-S1). These  
76 observations indicate that paternal-excess crosses induce increased auxin production and  
77 signalling in the endosperm of  $3x$  seeds.

78

### 79 **Over-production of auxin in the endosperm phenocopies paternal-excess triploid seeds**

80 Based on the finding that auxin activity is increased in  $3x$  seeds, we addressed the question  
81 whether over-production of auxin is responsible for the endosperm developmental defects  
82 leading to  $3x$  seed abortion. To test this hypothesis, we raised transgenic plants over-expressing

83 the bacterial auxin biosynthesis gene *Indole Acetamide Hydrolase (IaaH)* under the control of the  
84 early-endosperm specific promoter *DD25* (Tinland et al., 1991; Steffen et al., 2007). Strikingly, out  
85 of 31 analyzed transgenic lines, all showed aborting seeds that closely resembled paternal-excess  
86 3x seeds by their dark and shriveled appearance (Fig. 2A-C). In seven lines that were analyzed in  
87 detail and we found that the frequency of either partially or fully collapsed seeds ranged between  
88 10 to 40%, which largely corresponded with the rate of non-germinating seeds (Fig. 2-S1).  
89 Embryos of *DD25::IaaH* expressing lines were retarded in growth, similar to 3x embryos (Fig. 2 D-  
90 L). In both 3x seeds and those expressing *DD25::IaaH*, embryo development progressed up to the  
91 early heart stage without noticeable differences compared to 2x WT seeds (5 DAP time-point; Fig.  
92 2). However, from 6 DAP onwards, the embryos of 3x and *DD25::IaaH* transgenic seeds were  
93 delayed in development and did not progress beyond the torpedo stage (Fig. 2 D-L).

94 The endosperm of seeds derived from paternal-excess crosses fails to cellularize (Scott et al.,  
95 1998); therefore, we tested whether seeds expressing *DD25::IaaH* showed a similar  
96 developmental defect (Fig. 2M-O and Fig. 2-S3). Endosperm cellularization of 2x WT seeds  
97 initiated around 5 DAP and was almost complete at 7 DAP (Fig. 2-S3). Consistent with previous  
98 reports (Scott et al., 1998), in 3x seeds derived from paternal-excess crosses the endosperm failed  
99 to cellularize and free endosperm nuclei could be seen surrounding the embryo. Importantly,  
100 *DD25::IaaH* expression induced a similar phenotype and many seeds showed no signs of  
101 endosperm cellularization even at 7 DAP (Fig. 2-S3). These observations indicate that over-  
102 production of auxin in the endosperm is sufficient to impair its cellularization.

103 To test whether the phenotypes observed in *DD25::IaaH* lines are indeed caused by over-  
104 production of auxin in the endosperm, we crossed WT plants with pollen from *DD25::IaaH* plants.  
105 Indeed, we observed the same seed phenotypes when the transgene was inherited through  
106 pollen, confirming that endosperm-produced auxin is causal to this phenotype, and ruling out  
107 that the effect originates in maternal sporophytic tissues (Fig. 2-S1). Furthermore, when crossing  
108 maternal plants expressing the auxin reporter *DR5v2::VENUS* with pollen carrying the *DD25::IaaH*  
109 transgene, we observed a significant increase in VENUS fluorescence, similar to what is observed  
110 in paternal-excess crosses (Fig. 2-S1 and Fig. 1D-E). Together we conclude that increased auxin

111 production in the endosperm prevents endosperm cellularization, leading to a phenocopy of  
112 paternal-excess 3x seeds.

113

#### 114 **PEGs and AGAMOUS-LIKE genes are only partly de-regulated by auxin over-production**

115 Triploid paternal-excess seeds are characterized by a strong deregulation of PEGs and genes  
116 coding for AGAMOUS-LIKE (AGL) MADS-box transcription factors (Erilova et al., 2009; Kradolfer et  
117 al., 2013b). We tested whether overproduction of auxin causes a transcriptional phenocopy of 3x  
118 paternal-excess seeds by analyzing expression of PEGs and AGLs that were previously shown to  
119 be strongly deregulated in 3x seeds (Kradolfer et al., 2013a; Wolff et al., 2015). While PEG genes  
120 *ADM* and *PEG9* were not significantly deregulated in seeds of *DD25::laaH* expressing plants  
121 compared to 2x WT seeds, *PEG2* and the AGL genes *PHE1*, *AGL62*, and *AGL36* were expressed at  
122 significantly higher level in auxin-overproducing seeds (Fig. 3). However, their level of  
123 deregulation remained substantially lower compared to 3x seeds. This data suggest that auxin  
124 acts either independently of the pathways previously shown to affect 3x seed abortion (Kradolfer  
125 et al., 2013a; Wolff et al., 2015; Jiang et al., 2017) or, alternatively, that auxin signalling is  
126 downstream of PEG and AGL functions in the endosperm.

127

#### 128 **Decreased auxin biosynthesis and signalling suppress triploid seed abortion**

129 To address the question whether endosperm failure in 3x paternal excess seeds is due to over-  
130 production of auxin, we analyzed whether mutants for either auxin biosynthesis (*wei8 tar1 tar2-*  
131 *1/+*) (Stepanova et al., 2008), or auxin signalling (*axr1*) (Dharmasiri et al., 2007) could suppress 3x  
132 seed abortion. We generated 4x WT and *wei8 tar1 tar2/+* plants by colchicine treatment and used  
133 these plants as pollen donor in crosses with 2x WT or *wei8 tar1 tar2/+* mutant maternal plants.  
134 In the 2x × 4x WT cross, around 70% of the seeds were fully collapsed (Fig. 4A). In contrast, only  
135 20% of 3x *wei8 tar1 tar2/+* seeds were fully collapsed and the germination rate of mutant 3x  
136 seeds was nearly doubled compared to WT (Fig. 4B), revealing that decreased auxin biosynthesis  
137 can suppress triploid seed abortion. To substantiate these findings we tested the effect of the  
138 auxin signalling mutant *axr1* in suppressing 3x seed abortion. Using the *osd1* mutant as pollen  
139 donor resulted in around 50% fully collapsed 3x seeds, while only 20% of 3x seeds were fully

140 collapsed when using the *axr1 osd1* double mutant as pollen donor (Fig. 4C). The *axr1* 3x seeds  
141 were phenotypically distinct from 2x WT seeds by having a box-shaped phenotype (Fig. 4-S1);  
142 however, many of these seeds were viable and germinated at a rate of 40%, compared to 9% of  
143 3x WT seeds (Fig. 4D-F). These results demonstrate that decreased auxin signalling can suppress  
144 paternal-excess seed abortion. Triploid seed abortion is characterized by a failure of the  
145 endosperm to cellularize, we thus tested if this process was restored in the *axr1* mutant  
146 background (Fig. 4-S2). Endosperm cellularization dynamics in 2x *axr1* seeds was similar to that  
147 of 2x WT seeds (Fig. 2 and Fig. 2-S3) and the endosperm was almost fully cellularized at 7 DAP.  
148 Although cellularization in 3x *axr1* seeds was delayed compared to 2x seeds, signs of endosperm  
149 cellularization in this mutant were clearly visible at 7 DAP, as opposed to 3x WT seeds. We thus  
150 conclude that rescue of the 3x seed abortion by reduced auxin signalling occurs by restoration of  
151 endosperm cellularization.

152 As discussed above, *AGL* genes and *PEGs* are strongly upregulated in 3x seeds (Fig. 3). We  
153 addressed the question whether the rescue of 3x seeds by reduced auxin signalling restored gene  
154 expression to WT levels. Thus, we tested the expression of *AGL* genes and *PEGs* in 2x and 3x WT  
155 and *axr1* seeds. For all genes tested, their expression remained significantly increased in 3x *axr1*  
156 seeds, and, with the exception of *PEG2*, was even higher in 3x *axr1* seeds than 3x WT seeds (Fig.  
157 4 G-L). This data reveals that 3x seed rescue by decreased auxin signalling occurs independently  
158 of *PEGs* and *AGLs* and strongly suggests that auxin acts downstream of those pathways during  
159 endosperm development.

160  
161 **Downregulation of auxin biosynthesis and signaling genes coincides with endosperm**  
162 **cellularization**

163 The observation that over-production of auxin prevents endosperm cellularization suggests that  
164 auxin levels have to fall below a certain threshold in order for the endosperm to cellularize. To  
165 test this hypothesis we analyzed the expression of auxin biosynthesis, transport, and signaling  
166 genes in the micropylar and chalazal domains of the endosperm. Endosperm cellularization is  
167 initiated in the micropylar domain of the endosperm at around heart stage of embryo  
168 development, while cellularization in the chalazal domain occurs later when the embryo has



169 reached the torpedo stage (Mansfield and Briarty, 1990). Indeed, the expression level of the *PEGs*  
170 *YUC10* and *TAR1* was significantly lower in the micropylar endosperm of heart stage 2x embryos,  
171 when compared to earlier timepoints (Fig. 5A), consistent with the initiation of cellularization in  
172 2x seeds. The same expression pattern was observed for genes coding for PGP-type transporters  
173 and for several ARFs. Downregulation of auxin-related genes was substantially less pronounced  
174 in the chalazal endosperm domain, correlating with its delayed cellularization (Fig. 5A).  
175 Furthermore, in 3x seeds, where the endosperm fails to cellularize, there was a strong increase in  
176 expression of several auxin-related genes (Fig. 5B). Coinciding with rescued endosperm  
177 cellularization in 3x *adm* seeds (Kradolfer et al., 2013b), expression of auxin-related genes became  
178 downregulated (Fig. 5B). Together we conclude that increased auxin activity prevents endosperm  
179 cellularization, revealing a central regulatory role of auxin in the transition from the syncytial to  
180 the cellularized endosperm state.

181

## 182 **Discussion**

183 In many plant species crosses between individuals of different ploidies have long been known  
184 to result in abortion of the progeny due to failure of endosperm cellularization, a critical process  
185 in seed development (Scott et al., 1998; Sekine et al., 2013; Lafon-Placette and Kohler, 2016).  
186 Nevertheless, the molecular mechanisms underlying this developmental transition have  
187 remained elusive. Here we demonstrate that increased production of the plant hormone auxin  
188 prevents endosperm cellularization in 3x seeds of *Arabidopsis thaliana*. Thus, in addition to its  
189 known role to initiate endosperm development and seed coat formation (Figueiredo et al., 2015;  
190 Figueiredo et al., 2016), we propose that auxin levels need to be tightly controlled at later stages  
191 of seed development to allow the endosperm to cellularize. This hypothesis is strongly supported  
192 by our findings that over-production of auxin prevents endosperm cellularization in 2x seeds and  
193 that down-regulation of auxin activity in 3x seeds restores cellularization and, consequently, seed  
194 viability. Importantly, the auxin-induced endosperm phenotype is characteristic of paternal-  
195 excess crosses, leading to uncellularized inviable seeds (Scott et al., 1998; Sekine et al., 2013).  
196 Auxin biosynthesis genes *YUC10* and *TAR1* are imprinted and paternally-expressed in the  
197 endosperm (Hsieh et al., 2011; Wolff et al., 2011; Figueiredo et al., 2015). Like many other PEGs,

198 *YUC10* and *TAR1* are upregulated in the endosperm of 3x seeds (Wolff et al., 2015), likely causing  
199 increased auxin biosynthesis. The observed strong increase of ARF expression may be a  
200 consequence of a positive feedback loop, similar to the self-sustained activation of the ARF  
201 *MONOPTEROS* during early embryogenesis (Lau et al., 2011). ARFs are transcription factors that  
202 regulate the expression of auxin-responsive genes (Li et al., 2016; Weijers and Wagner, 2016) and  
203 thus are able to amplify the response to increased auxin levels in the endosperm.

204 Our data suggests that increased auxin activity in the endosperm is likely downstream or  
205 independent of AGLs and the known suppressors of 3x seed abortion *ADM*, *PEG2*, and *PEG9*  
206 (Kradolfer et al., 2013b; Wolff et al., 2015). This conclusion is based on the fact that increased  
207 auxin could induce a 3x seed-like phenotype without causing increased suppressor gene  
208 expression. Furthermore, reduced auxin signaling in *axr1* could suppress 3x seed abortion despite  
209 high expression levels of *ADM*, *PEG2*, and *PEG9*. Consistent with auxin acting downstream of  
210 *ADM*, most auxin-related genes being upregulated in 3x seeds became repressed in 3x *adm* seeds.  
211 We propose that endosperm cellularization can only take place when auxin levels are below a  
212 certain threshold. If this threshold is not reached, like in 3x seeds, the endosperm will fail to  
213 cellularize and the seed aborts. Interestingly, endosperm cellularization in maize occurs at around  
214 3 DAP, clearly before the rise of auxin levels at around 9 DAP (Lur and Setter, 1993). The rise in  
215 auxin levels coincides with the onset of endoreduplication and cellular differentiation in the  
216 endosperm, while proliferation rates decrease. It therefore seems unlikely that endosperm  
217 cellularization failure in 3x seeds is a consequence of auxin-induced nuclear overproliferation, but  
218 that nuclear proliferation and endosperm cellularization are mechanistically unlinked. This is  
219 consistent with data showing that both processes can be uncoupled in response to interspecies  
220 hybridization in rice (Ishikawa et al., 2011). Auxin is well known to induce changes in cell wall  
221 mechanical properties and cell wall synthesis. Auxin-induced organ outgrowth requires  
222 demethylesterification of pectin, which causes cell wall loosening (Braybrook and Peaucelle,  
223 2013). Auxin could have a similar role in the endosperm and by inducing demethylesterification  
224 and pectin degradation inhibit endosperm cellularization. We recently found increased  
225 demethylesterification activity in the endosperm of 3x seeds, adding support to this idea (Wolff  
226 et al., 2015).

227 In conclusion, we have shown that auxin regulates endosperm cellularization in *Arabidopsis*.  
228 Increased auxin levels in 3x seeds negatively interfere with endosperm cellularization, uncovering  
229 a central role of auxin in establishing hybridization barriers by changing the timing of endosperm  
230 cellularization.

## 231 **Materials and Methods**

### 232 **Plant material, growth conditions and treatments**

233 The *Arabidopsis thaliana* mutants and reporters used were described previously: *wei8-1/- tar1/-*  
234 *tar2-1/+* and *wei8-1/- tar1/- tar2-2/+* (Stepanova et al., 2008), *axr1-12/+* (Dharmasiri et al., 2007),  
235 *osd1-1* (d'Erfurth et al., 2009), *osd1-3* (Heyman et al., 2011).

236 Seeds were sterilized in 5% commercial bleach and 0.01% Tween-20 for 10 min and washed  
237 three times in sterile ddH<sub>2</sub>O. Sterile seeds were plated on ½ MS-medium (0.43% MS-salts, 0.8%  
238 Bacto Agar, 0.19% MES hydrate and 1% Sucrose; when necessary, the medium was supplemented  
239 with the appropriate antibiotics) and stratified at 4 °C in the dark for 48 h. Plates were then  
240 transferred to a growth chamber (16 h light / 8 h dark; 110 µmol.s<sup>-1</sup>.m<sup>-2</sup>; 21°C; 70% humidity).  
241 After 10 days seedlings were transferred to soil and grown in a growth chamber (16 h light / 8 h  
242 dark; 110 µmol.s<sup>-1</sup>.m<sup>-2</sup>; 21°C; 70% humidity).

243 Tetraploid plants were generated by treating two-week old seedlings with 7 µL of 0.25%  
244 colchicine. Treated plants were grown to maturity and scored for alterations in pollen size. Seeds  
245 of plants showing enlarged pollen grains were collected and the ploidy of the subsequent  
246 generation was determined in a Cyflow Ploidy Analyzer, using the Cystain UV Precise P kit  
247 (Sysmex).

248

### 249 **Transcriptome analysis**

250 Analysis of de-regulated genes in triploid seeds was done using previously published RNAseq  
251 data and following previously published procedures (Schatlowski et al., 2014). We generated a  
252 list of overexpressed genes in 3x seeds by filtering all genes with Log<sub>2</sub>FC (3x seeds vs. 2x seeds) >  
253 1, and p-value < 0.05. This list was used to determine enriched GO-terms. Significantly enriched  
254 biological processes were identified with AtCOECIS (Vandepoele et al., 2009) and further  
255 summarized using REVIGO (Supek et al., 2011).

256 To assess the individual behavior of auxin-related genes in 3x seeds, genes involved in  
257 biosynthesis, signaling, and transport of auxin were selected among the gene expression data  
258 produced by Schatlowski et al., (2014), and their Log<sub>2</sub>FC (3x seeds vs. 2x seeds) values were

259 plotted. Endosperm-specific expression of these genes was assessed using the transcriptome data  
260 of isolated endosperm from 3x and 2x seeds (Martinez et al., 2017).

261 To evaluate expression changes of auxin-related genes throughout endosperm development,  
262 we used published transcriptome data (Belmonte et al., 2013). Only auxin-related genes that  
263 were expressed at the pre-globular stage, in a given endosperm domain, were considered for  
264 further analysis. Gene expression values in each endosperm domain and for each time point were  
265 then normalized to the pre-globular stage, and subsequently log transformed. To determine how  
266 the expression of these genes is affected in 3x seeds, where endosperm cellularization is restored,  
267 we used previously published transcriptome data of seeds corresponding to the cross *Ler* x *osd1*  
268 *adm-2* (Wolff et al., 2015).

269

#### 270 **Cloning and generation of transgenic plants**

271 To clone the promoters of *DD25* (Steffen et al., 2007) and *GH3.3* (Gutierrez et al., 2012), WT Col-  
272 0 genomic DNA was used as a template. The amplified fragments were purified from the gel,  
273 recombined into the donor vector pDONR221 and sequenced. For *DD25* the insert was excised  
274 using the restriction sites *SacI* and *SpeI* introduced in the primer adaptors and used to replace in  
275 the CaMV35 promoter in the vector pB7WG2 (Karimi et al., 2002). The *IaaH* coding sequence was  
276 then recombined from an entry vector into pB7WG2, downstream of the *DD25* promoter, forming  
277 the *DD25::IaaH* construct. For *GH3.3*, the insert was recombined from the pENTRY vector into  
278 pB7FWG.0 (Karimi et al., 2002), forming *GH3.3::GH3.3:GFP*. Gateway cloning was done according  
279 to the manufacturer's instructions (Invitrogen). All primer sequences can be found in Table 2.

280 The constructs were transformed into *Agrobacterium tumefaciens* strain GV3101 and  
281 *Arabidopsis* plants were transformed using the floral dip method (Clough and Bent, 1998).  
282 Transformants were selected with the appropriate antibiotics.

283

#### 284 **Histological and fluorescence analyses**

285 For clearing of ovules and seeds the whole pistils/siliques were fixed with EtOH:acetic acid (9:1),  
286 washed for 10 min in 90% EtOH, 10 min in 70% EtOH and cleared over-night in chloralhydrate  
287 solution (66.7% chloralhydrate (w/w), 8.3% glycerol (w/w)). The ovules/seeds were observed

288 under differential interference contrast (DIC) optics using a Zeiss Axioplan or Axioscope A1  
289 microscopes. Images were recorded using a Leica DFC295 camera with a 0.63x optical adapter.

290 For fluorescence analysis seeds were mounted in 7% glucose. Where indicated, 0.1 mg/mL  
291 propidium iodide (PI) was used. Samples were analyzed under confocal microscopy on a Zeiss 780  
292 Inverted Axio Observer with a supersensitive GaAsp detector with the following settings (in nm;  
293 excitation-ex and emission-em): GFP – ex 488, em 499-525; PI – ex 488/514, em 635-719; YFP  
294 (VENUS) – ex 514, em 499-552 for DR5v2. Images were acquired, analyzed and exported using  
295 Zeiss ZEN software.

296 For Feulgen staining of seeds, whole siliques were fixed in ethanol:acetic acid (3:1) overnight.  
297 The samples were washed three times 15 min in water, followed by 1 h incubation in freshly  
298 prepared 5 N HCl, and washed again three times 15 min in water. Staining was performed for 4 h  
299 in Schiff reagent, followed by three 15 min washes in cold water and a series of 10 min washes in  
300 a series of ethanol dilutions (10, 30 and 50%). The samples were then incubated in 70% ethanol  
301 overnight, which was followed by a 10 min wash in 95% ethanol and 1 h in 99.5% ethanol.  
302 Embedding of the seeds was done in a dilution series of ethanol:LR White resin (1:3, 1:2, 1:1, 2:1)  
303 for 1 h each. The samples were then incubated overnight in LR White resin, mounted in LR White  
304 plus accelerator and baked overnight at 60°C for polymerization. The seeds were imaged in a Zeiss  
305 multiphoton LSM 710 NLO with excitation at 800 nm and emission between 565-610 nm. The  
306 images were treated using the ZEN software.

307

### 308 **RT-qPCR analyses**

309 For the determination of gene expression of *PEGs* and *AGLs*, ten whole siliques were collected  
310 for each cross and frozen in liquid nitrogen. All samples were collected in duplicate. Total RNA  
311 was extracted using the MagJET Plant RNA Purification Kit (Thermo Fisher Scientific) and 200 ng  
312 of total RNA were used to synthesize cDNA using the RevertAid First Strand cDNA Synthesis Kit  
313 (Thermo Fisher Scientific) using an oligo dT primer. Maxima SYBR Green qPCR Master Mix  
314 (Thermo Fisher Scientific) was used to perform the qPCR in a CFX Connect System (Bio-Rad). The  
315 primers used for the RT-qPCR are described in Table 2. *PP2A* was used as the reference gene.  
316 Relative quantification of gene expression was performed as described (Pfaffl, 2001).

317 **Acknowledgements** We are indebted to Dolf Weijers for providing the *DR5v2* reporter prior to  
318 publication, and to Eva Sundberg and Izabela Cierlik for providing the *laaH* pENTRY vector. This  
319 research was supported by a European Research Council Starting Independent Researcher grant  
320 (to C.K.), a grant from the Swedish Science Foundation (to C.K.), a grant from the Olle Engkvist  
321 Byggmästare Foundation (to C.K.), and a grant from the Knut and Alice Wallenberg Foundation  
322 (to C.K.).

323 **References**

- 324 **Belmonte, M.F., Kirkbride, R.C., Stone, S.L., Pelletier, J.M., Bui, A.Q., Yeung, E.C., Hashimoto,**  
325 **M., Fei, J., Harada, C.M., Munoz, M.D., Le, B.H., Drews, G.N., Brady, S.M., Goldberg, R.B.,**  
326 **and Harada, J.J. (2013).** Comprehensive developmental profiles of gene activity in regions  
327 and subregions of the *Arabidopsis* seed. *Proc Natl Acad Sci U S A* **110**, E435-E444.
- 328 **Bleckmann, A., Alter, S., and Dresselhaus, T. (2014).** The beginning of a seed: regulatory  
329 mechanisms of double fertilization. *Front Plant Sci* **5**, 452.
- 330 **Boer, D.R., Freire-Rios, A., van den Berg, Willy A.M., Saaki, T., Manfield, Iain W., Kepinski, S.,**  
331 **López-Vidriero, I., Franco-Zorrilla, Jose M., de Vries, Sacco C., Solano, R., Weijers, D., and**  
332 **Coll, M. (2014).** Structural basis for DNA binding specificity by the auxin-dependent ARF  
333 transcription factors. *Cell* **156**, 577-589.
- 334 **Boisnard-Lorig, C., Colon-Carmona, A., Bauch, M., Hodge, S., Doerner, P., Bancharel, E., Dumas,**  
335 **C., Haseloff, J., and Berger, F. (2001).** Dynamic analyses of the expression of the  
336 HISTONE::YFP fusion protein in *Arabidopsis* show that syncytial endosperm is divided in  
337 mitotic domains. *Plant Cell* **13**, 495-509.
- 338 **Braybrook, S.A., and Peaucelle, A. (2013).** Mechano-chemical aspects of organ formation in  
339 *Arabidopsis thaliana*: the relationship between auxin and pectin. *PLoS One* **8**, e57813.
- 340 **Cheng, Y., Dai, X., and Zhao, Y. (2007).** Auxin synthesized by the YUCCA flavin monooxygenases  
341 is essential for embryogenesis and leaf formation in *Arabidopsis*. *Plant Cell* **19**, 2430-2439.
- 342 **Clough, S.J., and Bent, A.F. (1998).** Floral dip: a simplified method for *Agrobacterium*-mediated  
343 transformation of *Arabidopsis thaliana*. *Plant J* **16**, 735-743.
- 344 **d'Erfurth, I., Jolivet, S., Froger, N., Catrice, O., Novatchkova, M., and Mercier, R. (2009).** Turning  
345 Meiosis into Mitosis. *PLOS Biol* **7**, e1000124.
- 346 **Dharmasiri, N., Dharmasiri, S., Weijers, D., Karunarathna, N., Jurgens, G., and Estelle, M. (2007).**  
347 AXL and AXR1 have redundant functions in RUB conjugation and growth and development  
348 in *Arabidopsis*. *Plant J* **52**, 114-123.
- 349 **Dresselhaus, T., Sprunck, S., and Wessel, G.M. (2016).** Fertilization Mechanisms in Flowering  
350 Plants. *Current Biology* **26**, R125-R139.
- 351 **Erilova, A., Brownfield, L., Exner, V., Rosa, M., Twell, D., Mittelsten Scheid, O., Hennig, L., and**  
352 **Kohler, C. (2009).** Imprinting of the polycomb group gene *MEDEA* serves as a ploidy sensor  
353 in *Arabidopsis*. *PLoS genetics* **5**, e1000663.
- 354 **Figueiredo, D.D., Batista, R.A., Roszak, P.J., and Köhler, C. (2015).** Auxin production couples  
355 endosperm development to fertilization. *Nat Plants* **1**, 15184.
- 356 **Figueiredo, D.D., Batista, R.A., Roszak, P.J., Hennig, L., and Kohler, C. (2016).** Auxin production  
357 in the endosperm drives seed coat development in *Arabidopsis*. *Elife* **5**.
- 358 **Gutierrez, L., Mongelard, G., Floková, K., Păcurar, D.I., Novák, O., Staswick, P., Kowalczyk, M.,**  
359 **Păcurar, M., Demailly, H., Geiss, G., and Bellini, C. (2012).** Auxin controls *Arabidopsis*  
360 adventitious root initiation by regulating jasmonic acid homeostasis. *Plant Cell* **24**, 2515-  
361 2527.
- 362 **Hehenberger, E., Kradolfer, D., and Köhler, C. (2012).** Endosperm cellularization defines an  
363 important developmental transition for embryo development. *Development* **139**, 2031-  
364 2039.



- 365 **Heyman, J., Van den Daele, H., De Wit, K., Boudolf, V., Berckmans, B., Verkest, A., Kamei, C.L.A.,**  
366 **De Jaeger, G., Koncz, C., and De Veylder, L. (2011).** *Arabidopsis* ULTRAVIOLET-B-  
367 INSENSITIVE4 Maintains Cell Division Activity by Temporal Inhibition of the Anaphase-  
368 Promoting Complex/Cyclosome. *Plant Cell* **23**, 4394-4410.
- 369 **Hsieh, T.F., Shin, J., Uzawa, R., Silva, P., Cohen, S., Bauer, M.J., Hashimoto, M., Kirkbride, R.C.,**  
370 **Harada, J.J., Zilberman, D., and Fischer, R.L. (2011).** Regulation of imprinted gene  
371 expression in *Arabidopsis* endosperm. *Proc Natl Acad Sci U S A* **108**, 1755-1762.
- 372 **Huang, F., Zhu, Q.H., Zhu, A., Wu, X., Xie, L., Wu, X., Helliwell, C., Chaudhury, A., Finnegan, E.J.,**  
373 **and Luo, M. (2017).** Mutants in the imprinted *PICKLE RELATED 2* gene suppress seed  
374 abortion of *fertilization independent seed* class mutants and paternal excess interploidy  
375 crosses in *Arabidopsis*. *Plant J* **90**, 383-395.
- 376 **Ishikawa, R., Ohnishi, T., Kinoshita, Y., Eiguchi, M., Kurata, N., and Kinoshita, T. (2011).** Rice  
377 interspecies hybrids show precocious or delayed developmental transitions in the  
378 endosperm without change to the rate of syncytial nuclear division. *Plant J* **65**, 798-806.
- 379 **Jiang, H., Moreno-Romero, J., Santos-Gonzalez, J., De Jaeger, G., Gevaert, K., Van De Slijke, E.,**  
380 **and Kohler, C. (2017).** Ectopic application of the repressive histone modification H3K9me2  
381 establishes post-zygotic reproductive isolation in *Arabidopsis thaliana*. *Genes Dev.*
- 382 **Karimi, M., Inze, D., and Depicker, A. (2002).** GATEWAY vectors for *Agrobacterium*-mediated  
383 plant transformation. *Trends Plant Sci* **7**, 193-195.
- 384 **Kradolfer, D., Hennig, L., and Köhler, C. (2013a).** Increased maternal genome dosage bypasses  
385 the requirement of the FIS polycomb repressive complex 2 in *Arabidopsis* seed  
386 development. *PLoS genetics* **9**, e1003163.
- 387 **Kradolfer, D., Wolff, P., Jiang, H., Siretskiy, A., and Köhler, C. (2013b).** An Imprinted Gene  
388 Underlies Postzygotic Reproductive Isolation in *Arabidopsis thaliana*. *Dev Cell* **26**, 525-535.
- 389 **Křeček, P., Skůpa, P., Libus, J., Naramoto, S., Tejos, R., Friml, J., and Zažímalová, E. (2009).** The  
390 PIN-FORMED (PIN) protein family of auxin transporters. *Genome Biol* **10**, 249-249.
- 391 **Lafon-Placette, C., and Kohler, C. (2016).** Endosperm-based postzygotic hybridization barriers:  
392 developmental mechanisms and evolutionary drivers. *Mol Ecol* **25**, 2620-2629.
- 393 **Lau, S., De Smet, I., Kolb, M., Meinhardt, H., and Jurgens, G. (2011).** Auxin triggers a genetic  
394 switch. *Nat Cell Biol* **13**, 611-615.
- 395 **Leblanc, O., Pointe, C., and Hernandez, M. (2002).** Cell cycle progression during endosperm  
396 development in *Zea mays* depends on parental dosage effects. *Plant J* **32**, 1057-1066.
- 397 **Li, J., and Berger, F. (2012).** Endosperm: food for humankind and fodder for scientific discoveries.  
398 *New Phytol* **195**, 290-305.
- 399 **Li, S.B., Xie, Z.Z., Hu, C.G., and Zhang, J.Z. (2016).** A review of Auxin Response Factors (ARFs) in  
400 plants. *Front Plant Sci* **7**, 47.
- 401 **Liao, C.Y., Smet, W., Brunoud, G., Yoshida, S., Vernoux, T., and Weijers, D. (2015).** Reporters for  
402 sensitive and quantitative measurement of auxin response. *Nat Methods* **12**, 207-210, 202  
403 p following 210.
- 404 **Lin, R., and Wang, H. (2005).** Two homologous ATP-binding cassette transporter proteins,  
405 AtMDR1 and AtPGP1, regulate *Arabidopsis* photomorphogenesis and root development  
406 by mediating polar auxin transport. *Plant physiology* **138**, 949-964.
- 407 **Lur, H.S., and Setter, T.L. (1993).** Role of auxin in maize endosperm development (timing of nuclear  
408 DNA endoreduplication, zein expression, and cytokinin). *Plant physiology* **103**, 273-280.

- 409 **Mansfield, S., and Briarty, L.** (1990). Endosperm cellularization in *Arabidopsis thaliana* (L.). *Arab.*  
410 *Inf. Serv* **27**, 65-72.
- 411 **Martinez, G., Wolff, P., Wang, Z., Moreno-Romero, J., Santos-Gonzalez, J., Liu Conze, L., DeFraia,**  
412 **C., Slotkin, K., and Kohler, C.** (2017). Paternal easiRNAs regulate parental genome dosage  
413 in *Arabidopsis*. bioRxiv.
- 414 **Pfaffl, M.W.** (2001). A new mathematical model for relative quantification in real-time RT-PCR.  
415 *Nucleic Acids Res* **29**, e45.
- 416 **Schatlowski, N., Wolff, P., Santos-González, J., Schoft, V., Siretskiy, A., Scott, R., Tamaru, H., and**  
417 **Köhler, C.** (2014). Hypomethylated pollen bypasses the interploidy hybridization barrier  
418 in *Arabidopsis*. *Plant Cell* **26**, 3556-3568.
- 419 **Scott, R.J., Spielman, M., Bailey, J., and Dickinson, H.G.** (1998). Parent-of-origin effects on seed  
420 development in *Arabidopsis thaliana*. *Development* **125**, 3329-3341.
- 421 **Sekine, D., Ohnishi, T., Furuumi, H., Ono, A., Yamada, T., Kurata, N., and Kinoshita, T.** (2013).  
422 Dissection of two major components of the post-zygotic hybridization barrier in rice  
423 endosperm. *Plant J* **76**, 792-799.
- 424 **Steffen, J.G., Kang, I.H., Macfarlane, J., and Drews, G.N.** (2007). Identification of genes expressed  
425 in the *Arabidopsis* female gametophyte. *Plant J* **51**, 281-292.
- 426 **Stepanova, A.N., Robertson-Hoyt, J., Yun, J., Benavente, L.M., Xie, D.Y., Dolezal, K., Schlereth,**  
427 **A., Jurgens, G., and Alonso, J.M.** (2008). TAA1-mediated auxin biosynthesis is essential for  
428 hormone crosstalk and plant development. *Cell* **133**, 177-191.
- 429 **Stoute, A.I., Varenko, V., King, G.J., Scott, R.J., and Kurup, S.** (2012). Parental genome imbalance  
430 in Brassica oleracea causes asymmetric triploid block. *Plant J* **71**, 503-516.
- 431 **Supek, F., Bosnjak, M., Skunca, N., and Smuc, T.** (2011). REVIGO summarizes and visualizes long  
432 lists of gene ontology terms. *PLoS One* **6**, e21800.
- 433 **Tinland, B., Kares, C., Herrmann, A., and Otten, L.** (1991). *35S-β-glucuronidase* gene blocks  
434 biological effects of cotransferred *iaa* genes. *Plant Mol Biol* **16**, 853-864.
- 435 **Vandepoele, K., Quimbaya, M., Casneuf, T., De Veylder, L., and Van de Peer, Y.** (2009).  
436 Unraveling transcriptional control in *Arabidopsis* using cis-regulatory elements and  
437 coexpression networks. *Plant physiology* **150**, 535-546.
- 438 **Wangenheim, K.H.V.** (1962). Zur Ursache Der Abortion Von Samenanlagen in Diploid-Polyploid-  
439 Kreuzungen .2. Unterschiedliche Differenzierung Von Endospermen Mit Gleichem Genom.  
440 *Z Vererbungsl* **93**, 319-&.
- 441 **Weijers, D., and Wagner, D.** (2016). Transcriptional responses to the auxin hormone. *Annu Rev*  
442 *Plant Biol* **67**, 539-574.
- 443 **Wolff, P., Jiang, H., Wang, G., Santos-Gonzalez, J., and Kohler, C.** (2015). Paternally expressed  
444 imprinted genes establish postzygotic hybridization barriers in *Arabidopsis thaliana*. *eLife*  
445 **4**.
- 446 **Wolff, P., Weinhofer, I., Seguin, J., Roszak, P., Beisel, C., Donoghue, M.T., Spillane, C., Nordborg,**  
447 **M., Rehmsmeier, M., and Köhler, C.** (2011). High-resolution analysis of parent-of-origin  
448 allelic expression in the *Arabidopsis* endosperm. *PLoS genetics* **7**, e1002126.

449

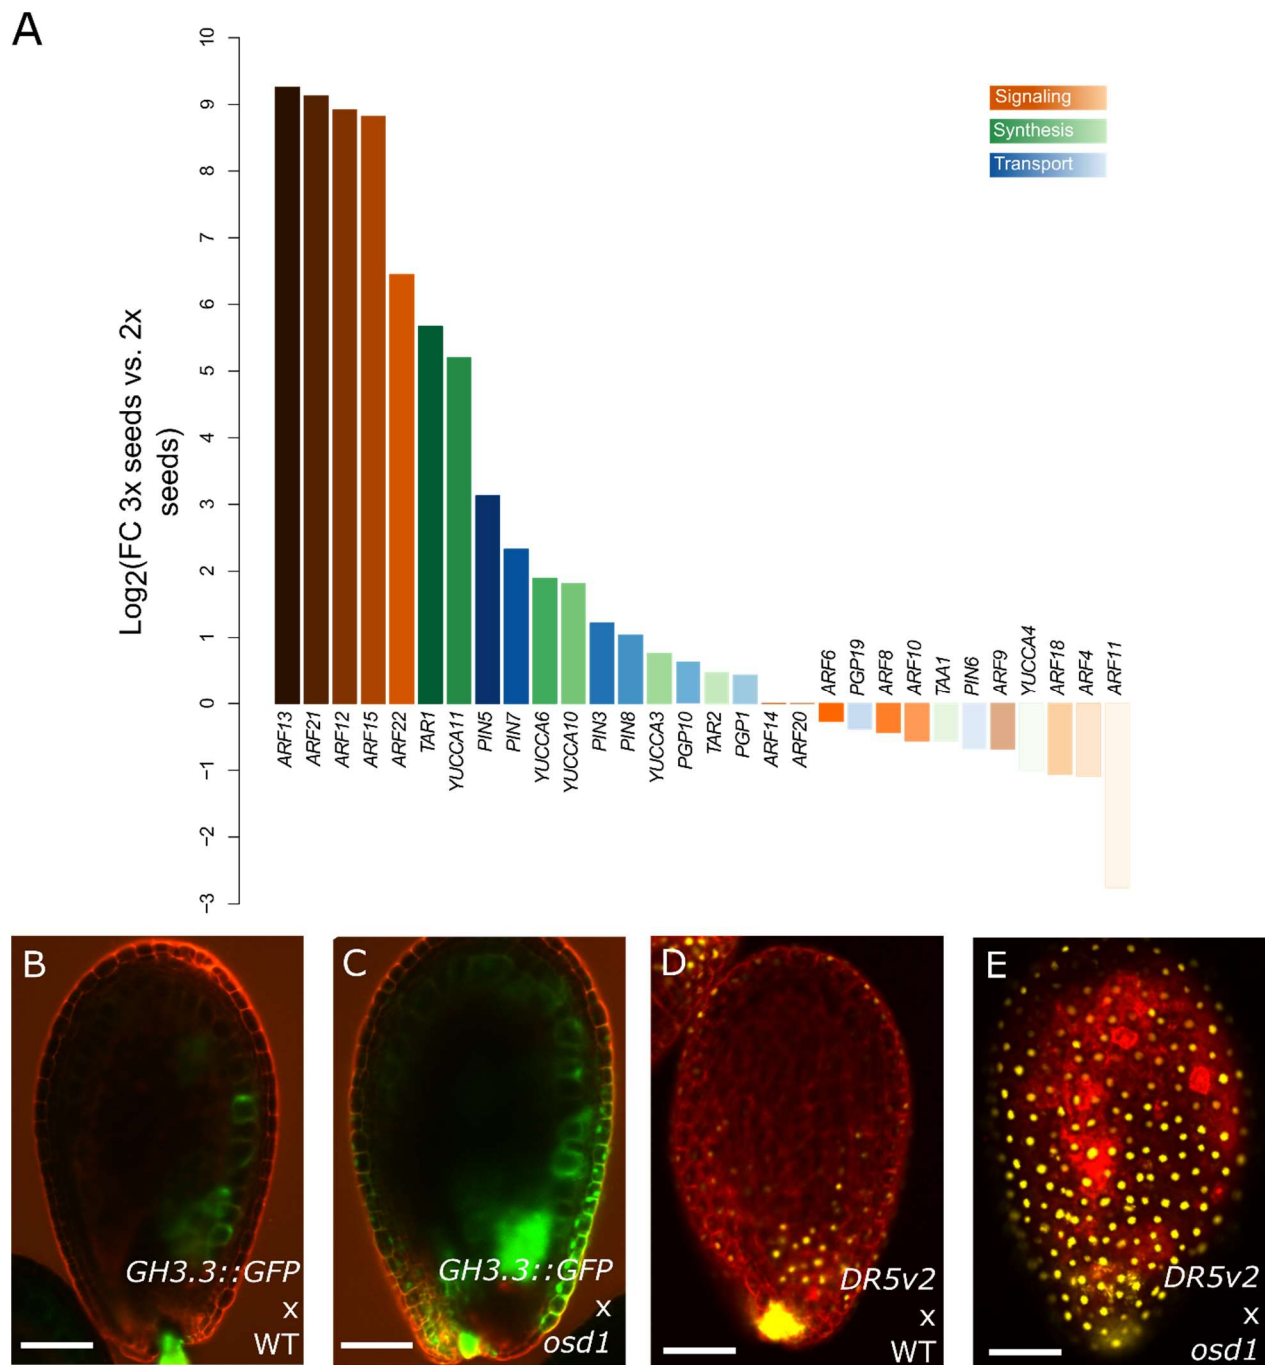

450  
 451 **Figure 1. Auxin is overproduced in 3x seeds.** (A) Log<sub>2</sub>-fold expression change between 3x and 2x  
 452 seeds of genes coding for auxin biosynthesis (green bars), signalling (orange bars) and transport  
 453 proteins (blue bars). (B-E) Auxin activity as measured by expression of *GH3.3::GFP* (B-C) or  
 454 *DR5v2::VENUS* (D-E) in 2x (B, D) and 3x (C, E) seeds at 5 days after pollination. Pictures show  
 455 representative seeds of three independent siliques per cross. Red staining is propidium iodide.  
 456 Scale bars indicate 100  $\mu$ m.

A

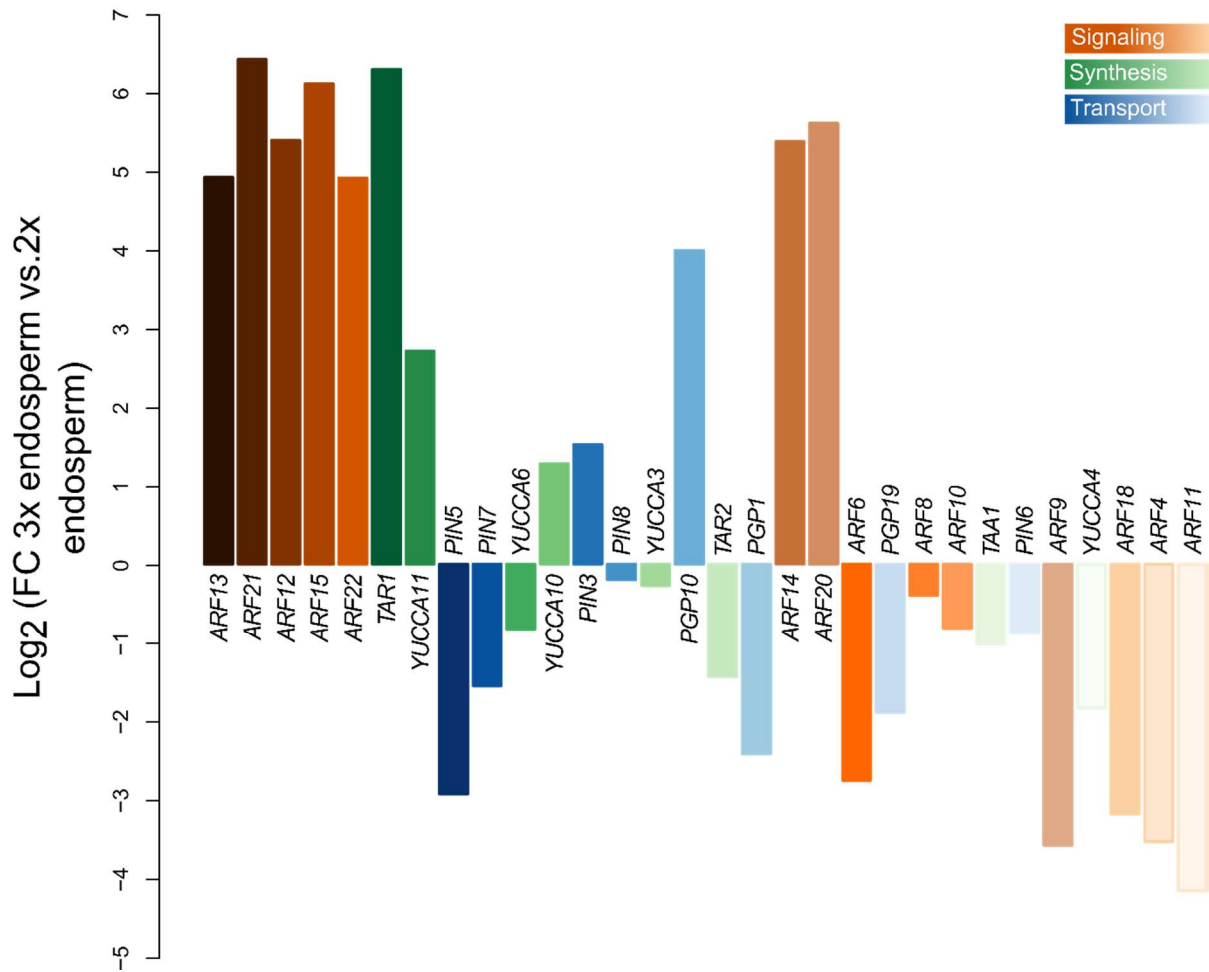

457

458 **Figure 1-S1. Auxin-related genes are upregulated in the endosperm of 3x seeds.** Log2-fold  
459 expression change between genes expressed in the endosperm of 3x and 2x seeds. Genes coding  
460 for auxin signaling, biosynthesis, and transport proteins are indicated by orange, green and blue  
461 colors, respectively.

462



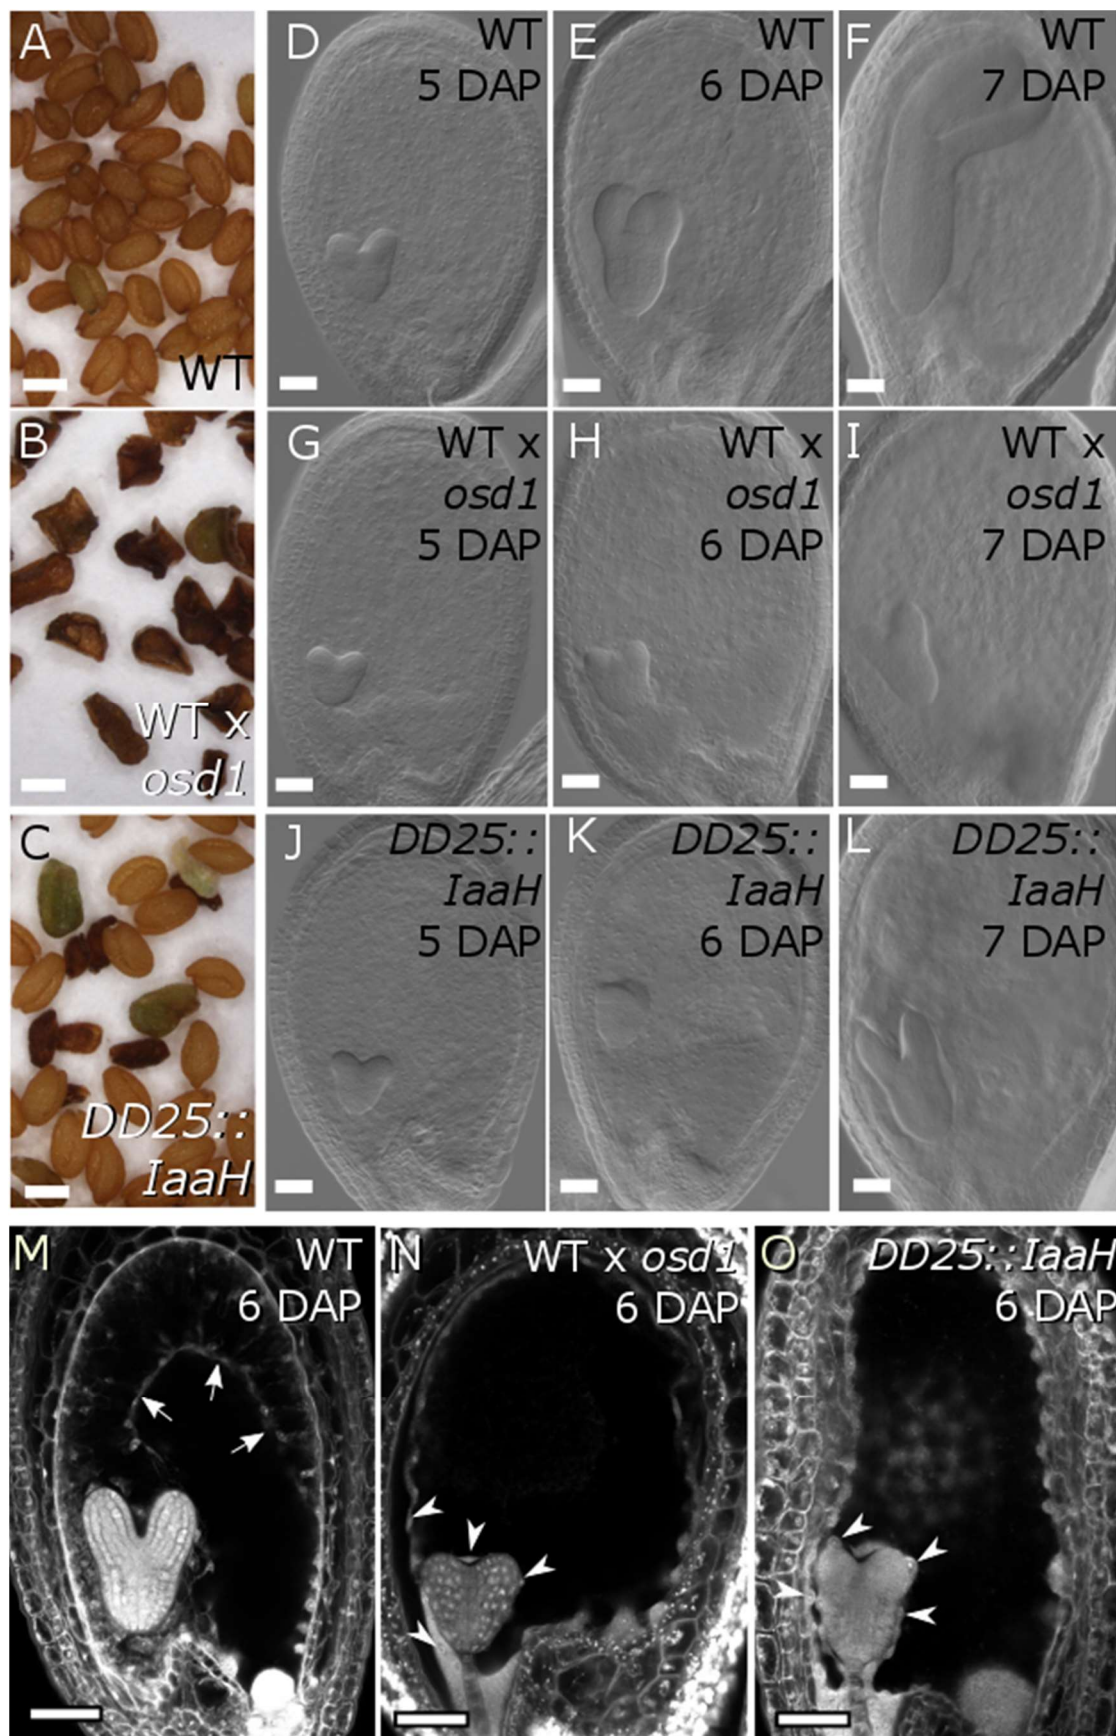

464 **Figure 2. Increased auxin in the endosperm prevents cellularization.** (A-C) Dry seed morphology  
465 of WT 2x (A), WT 3x (B) and *DD25::laaH* 2x seeds (C). Scale bars indicate 0.5 mm. (D-L) Clearings  
466 of WT 2x (D-F), WT 3x (G-I) and *DD25::laaH* 2x seeds (J-L), from 5 to 7 days after pollination (DAP).  
467 Pictures show representative seeds of three independent siliques per cross. Scale bars indicate  
468 50  $\mu$ m. (M-O) Endosperm cellularization as determined by Feulgen staining at 6 DAP for 2x seeds  
469 (M), 3x seeds (N) and 2x seeds expressing *DD25::laaH* (O). Pictures show representative seeds of  
470 10 independent siliques per cross. Arrows indicate cellularized peripheral endosperm and  
471 arrowheads indicate free endosperm nuclei surrounding the embryo. Scale bars indicate 50  $\mu$ m.  
472 WT, wild type.

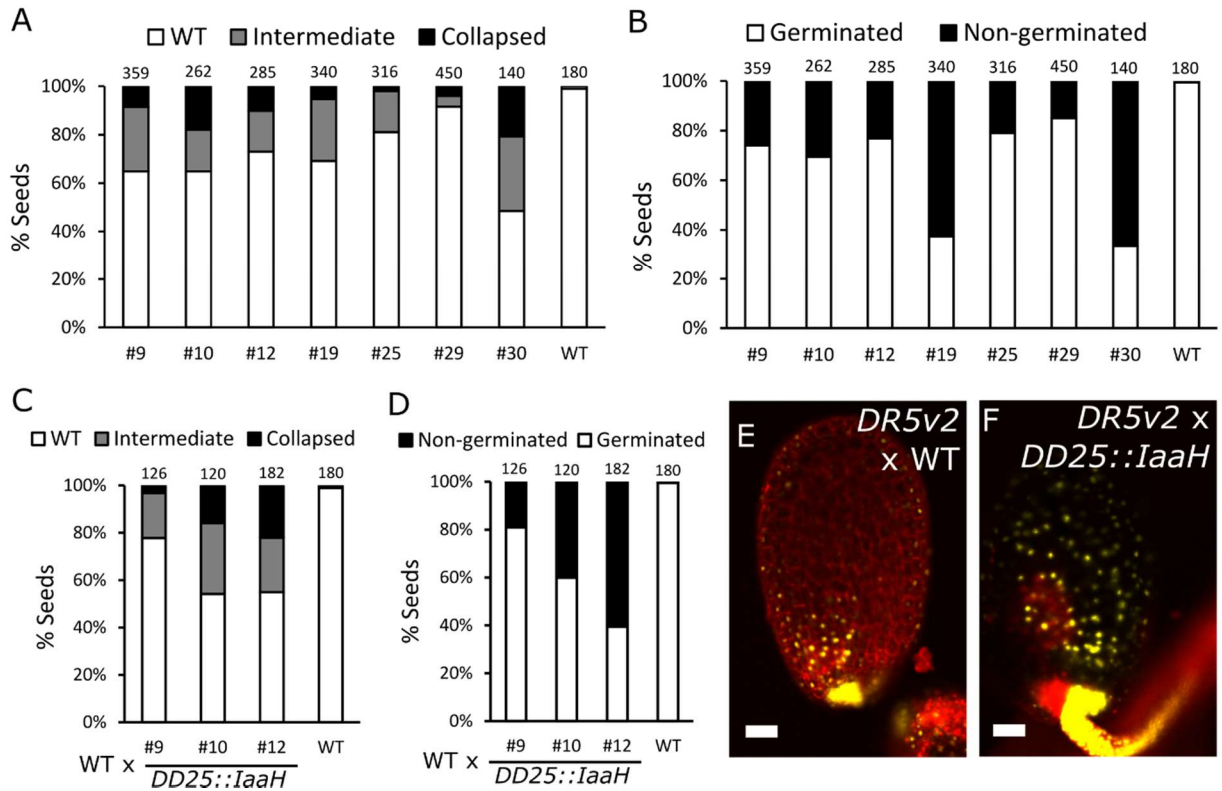

473

474

475 **Figure 2-S1. Expression of *DD25::IaaH* induces seed abortion.** (A) Quantification of seed  
 476 phenotypes in independent lines expressing *DD25::IaaH*. The seeds were classified in three  
 477 distinct classes, as shown in Fig. 2-S2. (B) Seed germination rates in lines expressing *DD25::IaaH*.  
 478 (C, D) Same as for (A) and (B), but using *DD25::IaaH* as pollen donor crossed to WT. Numbers on  
 479 top indicate number of seeds analyzed. (E-F) Activity of maternal *DR5v2* at 5 days after pollination  
 480 with WT (E) or *DD25::IaaH* (F) pollen. Pictures show representative seeds of three independent  
 481 siliques per cross. Red staining is propidium iodide. Scale bars indicate 50  $\mu$ m. WT, wild type.

482

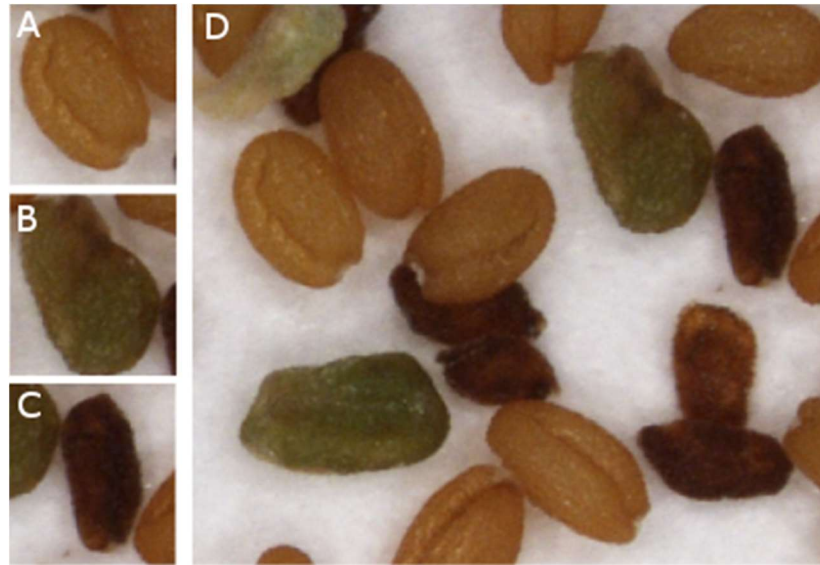

483  
484 **Figure 2-S2. Seed classification used for the phenotypic quantification of *DD25::laaH***  
485 **phenotypes in Fig. 2-S1 and Fig. 4. (A) WT-like seed, (B) Intermediate phenotype, misshapen**  
486 **seeds, (C) Fully collapsed and shriveled seed. (D) Overall view of the progeny of a *DD25::laaH***  
487 **transgenic line.**



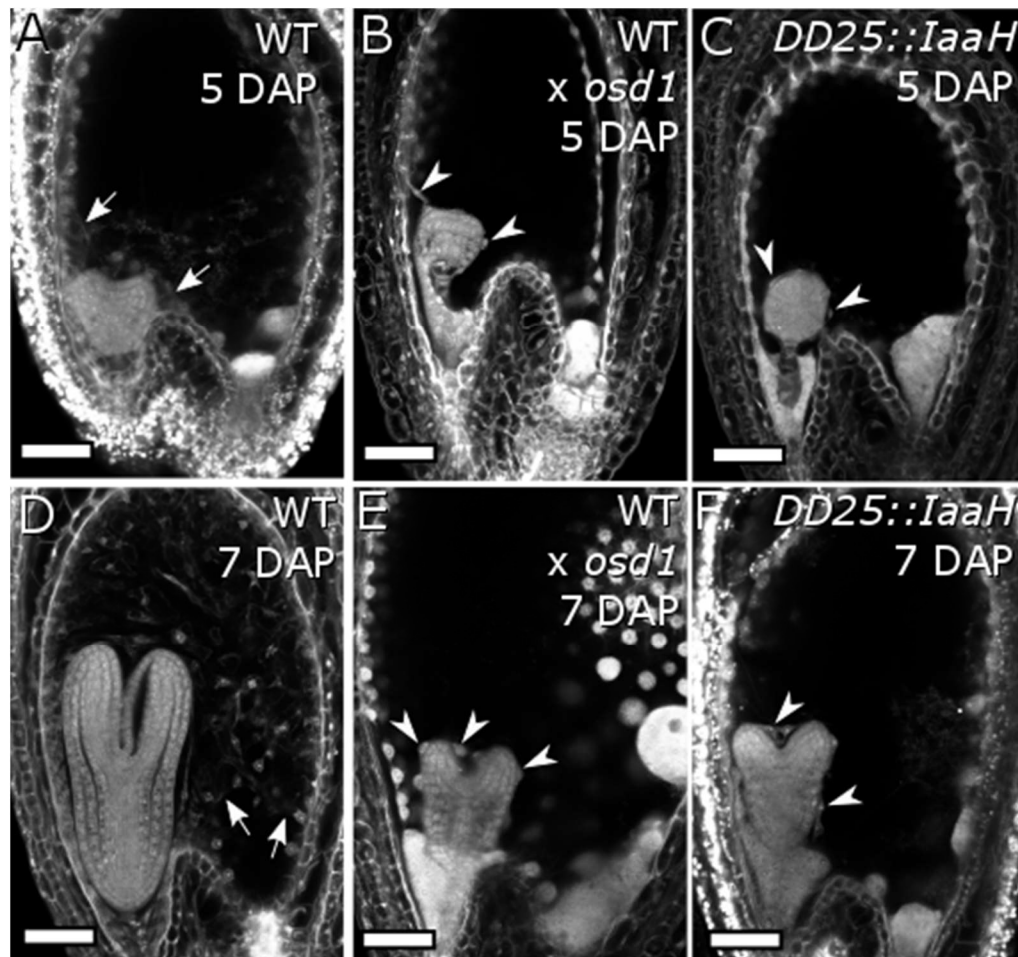

488

489 **Figure 2-S3. Endosperm cellularization as determined by Feulgen staining.** (A-C) Seeds at 5 days  
490 after pollination (DAP) of WT 2x (A), WT 3x (B) and *DD25::IaaH* 2x (C). (D-F) Same as for (A-C), but  
491 for 7 DAP seeds. Pictures show representative seeds of 10 independent siliques per cross. Arrows  
492 indicate cellularized endosperm and arrowheads indicate free endosperm nuclei surrounding the  
493 embryo. Scale bars indicate 50 μm. WT, wild type.

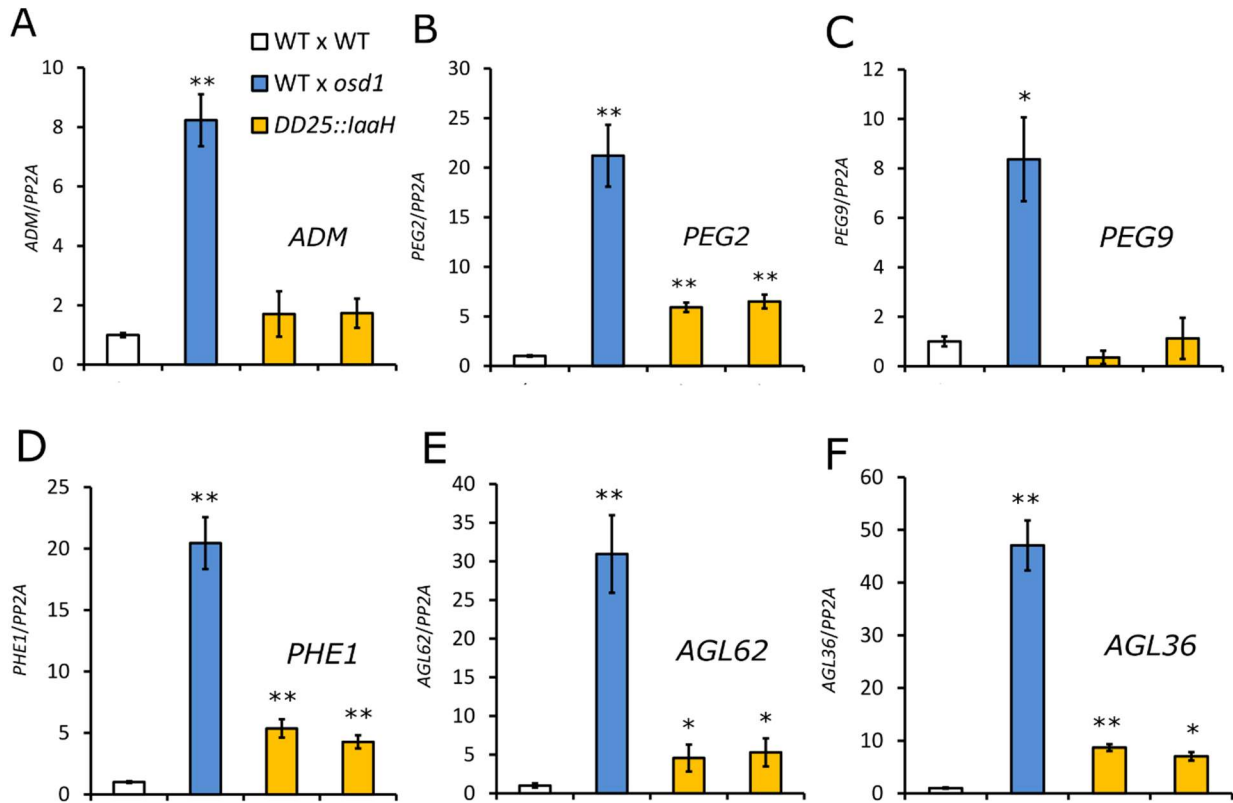

494

495 **Figure 3. PEGs and AGL genes are not substantially deregulated in *DD25::laaH* transgenic seeds.**

496 Relative gene expression in seeds at 6 days after pollination (DAP), as determined by RT-qPCR, in  
497 2x WT, 3x WT and 2x *DD25::laaH* transgenic seeds of two independent lines for *ADM* (A), *PEG2*  
498 (B), *PEG9* (C), *PHE1* (D), *AGL62* (E) and *AGL36* (F). Results from a representative biological replicate  
499 are shown. Three technical replicates were performed and error bars indicate standard deviation.  
500 Differences are significant for Student's T-test for p<0.05 (\*) or p<0.001 (\*\*). WT, wild-type.

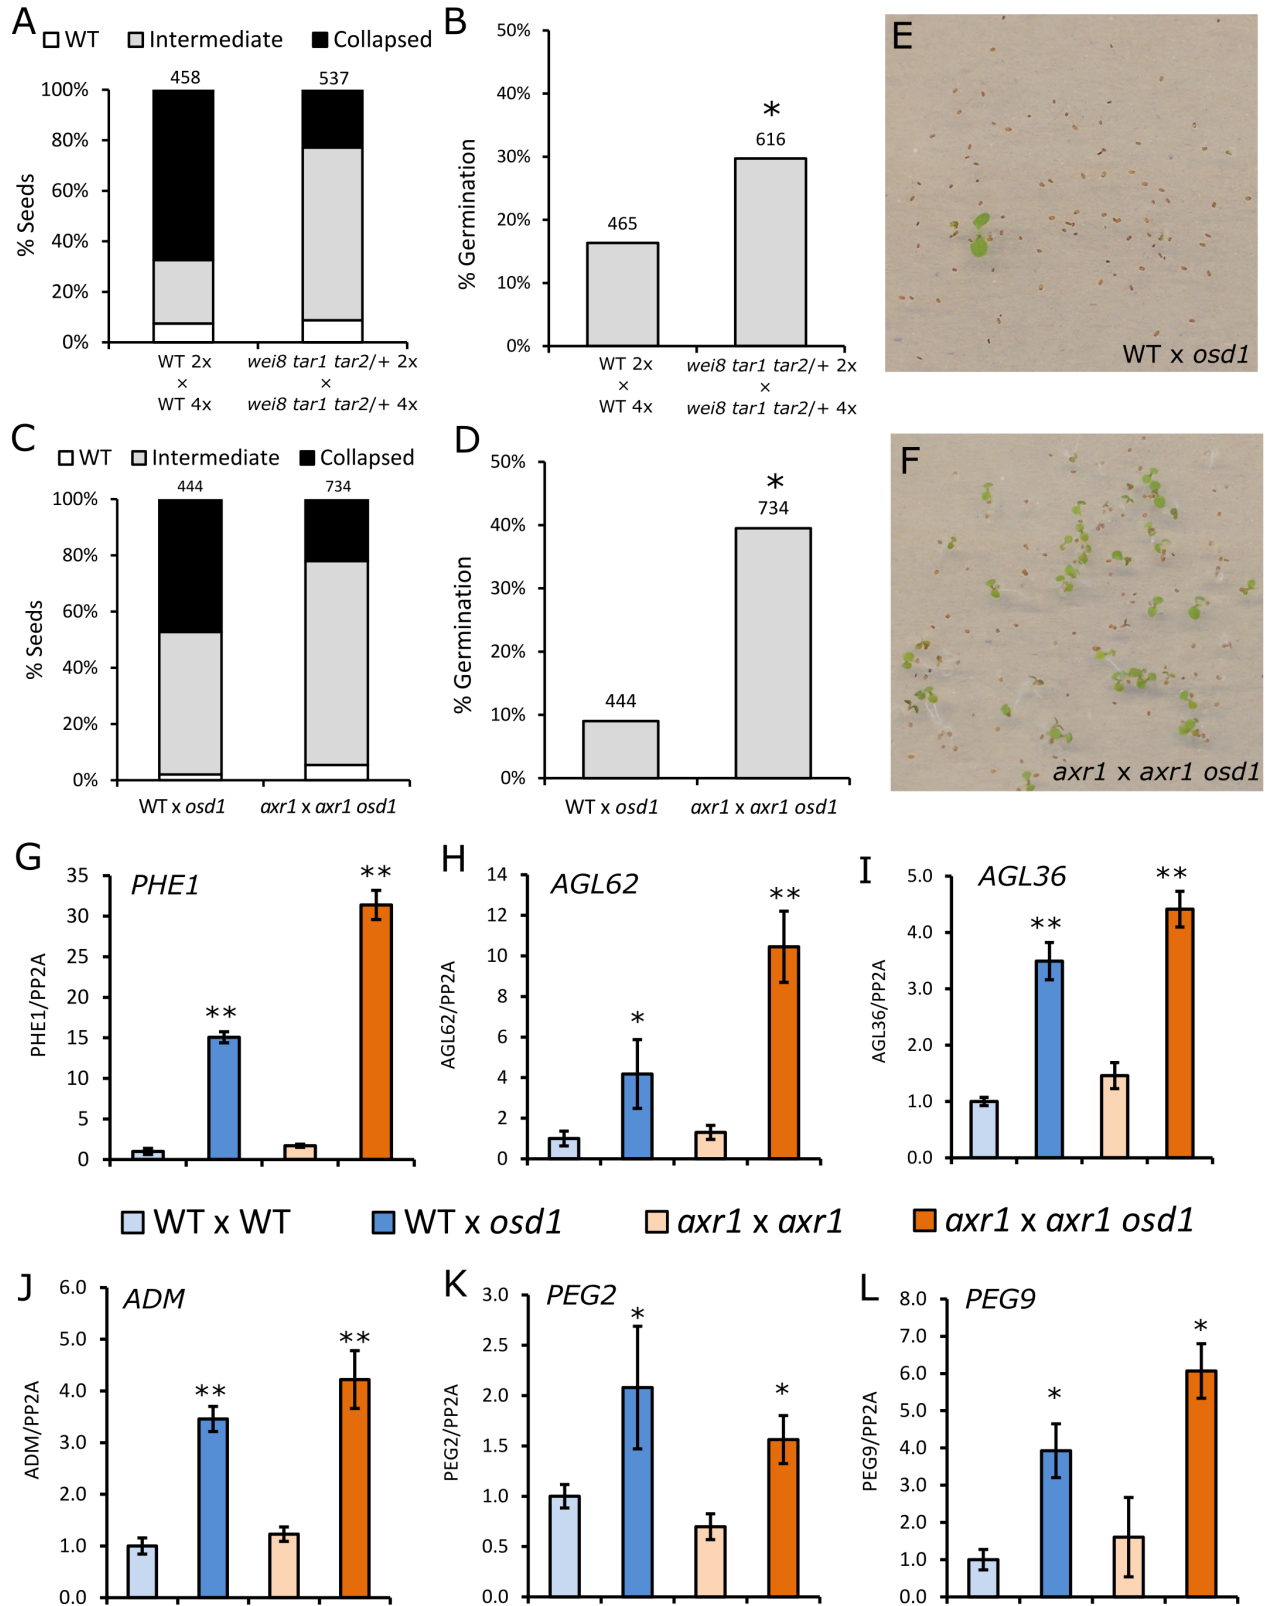

502 **Figure 4. Mutants in auxin biosynthesis and signaling suppress triploid seed abortion.** (A, B)  
503 Phenotypic classification of 3x seeds in WT background and in the *wei8 tar1 tar2* auxin  
504 biosynthesis mutant (A), and their corresponding germination rate (B). (C, D) Same as for (A) and  
505 (B), but for the auxin signalling mutant *axr1*. Seed classification was done according to Fig. 2 – S2.  
506 Numbers on top indicate number of seeds assayed. Differences between WT and mutant seed  
507 germination in (B) and (D) are significant for Chi-square test for  $p < 0.0001$  (\*). (E, F) Representative  
508 image of germinating triploid seedlings in WT (E) and *axr1* (F). (G-L) Relative gene expression in 6  
509 DAP seeds, as determined by RT-qPCR, in 2x and 3x seeds in WT and *axr1* mutant backgrounds,  
510 for *PHE1* (G), *AGL62* (H), *AGL36* (I), *ADM* (J), *PEG2* (K) and *PEG9* (L). Results of a representative  
511 biological replicate are shown. Three technical replicates were performed and error bars indicate  
512 standard deviation. Differences between 3x seeds and each respective 2x control are significant  
513 for Student's T-test for  $p < 0.05$  (\*) or  $p < 0.001$ (\*\*).

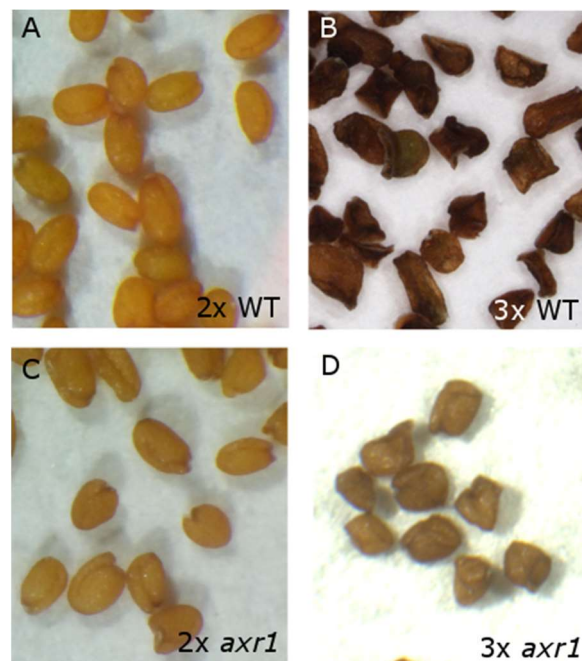

514

515 **Figure 4 – S1. Seed phenotypes of 2x and 3x seeds.** Mature seeds of WT Col-0, 2x (A) and 3x (B),

516 and *axr1* mutant, 2x (C) and 3x (D).

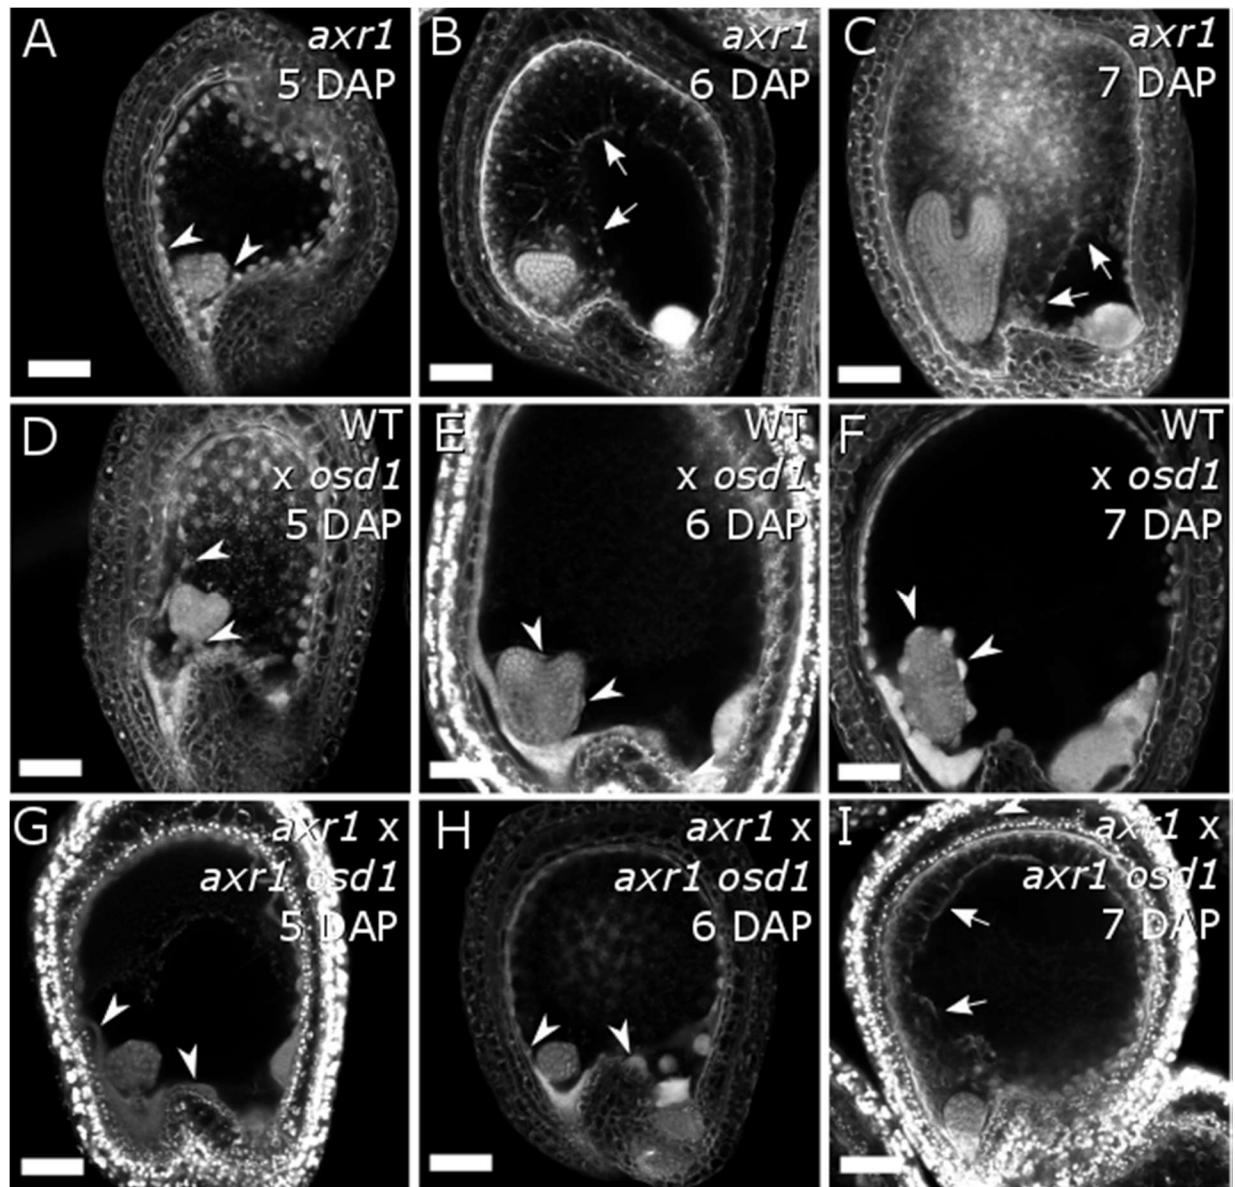

517

518 **Figure 4 – S2. Loss of AXR1 function restores endosperm cellularization in 3x seeds.** (A-C) 2x *axr1*  
519 seeds at 5, 6 and 7 days after pollination (DAP). (D-F) Same as for (A-C), but for 3x WT seeds. (G-  
520 I) Same as (A-C), but for 3x *axr1* seeds. Pictures show representative seeds of 10 independent  
521 siliques per cross. Arrows indicate cellularized endosperm and arrowheads indicate free  
522 endosperm nuclei surrounding the embryo. Scale bars indicate 50  $\mu$ m. WT, wild type.



A

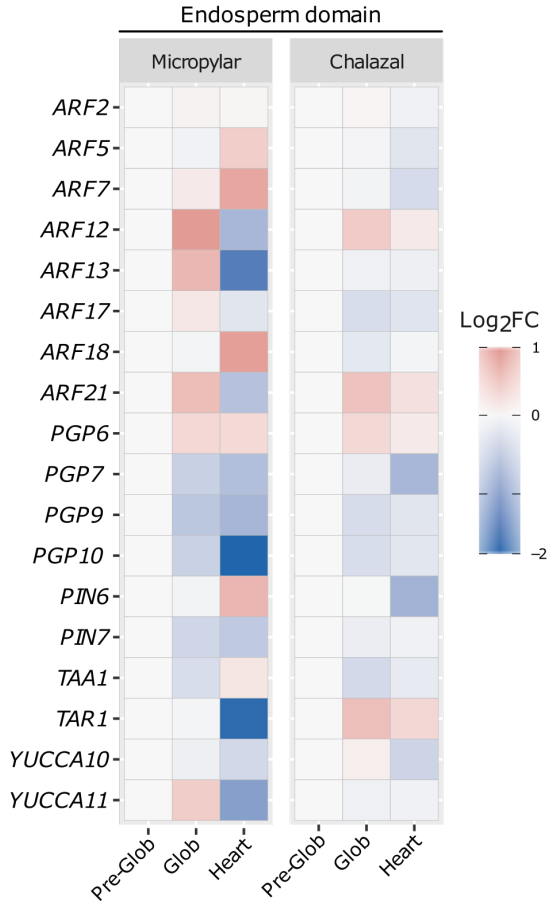

B

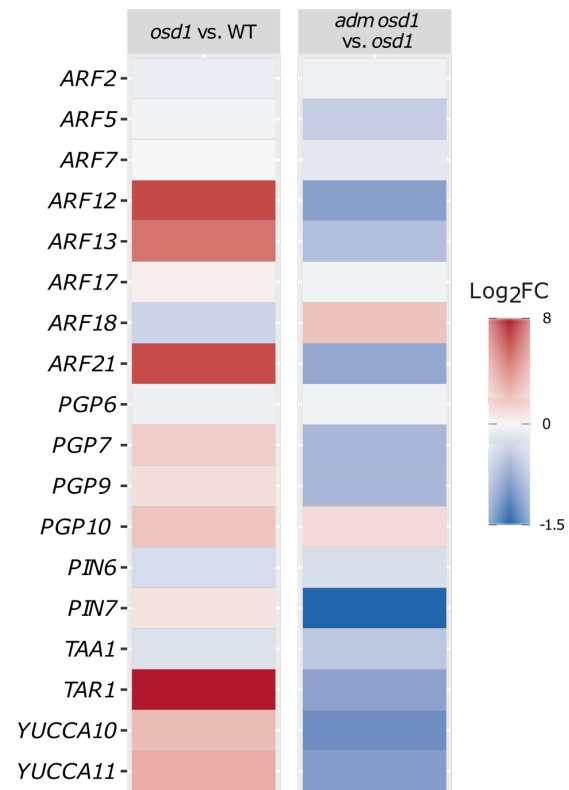

523

524 **Figure 5. Endosperm cellularization is associated with downregulation of auxin-related gene**  
 525 **expression.** (A) Expression of auxin-related genes in the micropylar and chalazal endosperm  
 526 domains, throughout different stages of seed development. Expression in each domain is  
 527 normalized to the pre-globular stage and expressed as a log<sub>2</sub>-fold change relative to that stage.  
 528 (B) Log<sub>2</sub>-fold change of expression of auxin-related genes in 3x (*osd1*) versus 2x seeds and 3x *adm*  
 529 seeds (*osd1 adm*) versus 3x seeds (*osd1*).

530 **Table 1.** Significantly enriched biological processes for genes upregulated at 6 days after  
 531 pollination in 3x seeds (*Ler* × *osd1* cross) compared to 2x seeds (*Ler* × *Col* cross) (Log<sub>2</sub>FC>1, p-  
 532 value<0.05)

| GO-term           | p-value        | Number of genes | Description                                      |
|-------------------|----------------|-----------------|--------------------------------------------------|
| GO:0009827        | 1.5E-04        | 25              | plant-type cell wall modification                |
| GO:0010167        | 1.0E-03        | 21              | response to nitrate                              |
| GO:0015698        | 1.6E-03        | 25              | inorganic anion transport                        |
| GO:0006869        | 1.6E-03        | 20              | lipid transport                                  |
| GO:0043086        | 4.3E-03        | 13              | negative regulation of catalytic activity        |
| GO:0010106        | 5.6E-03        | 13              | cellular response to iron ion starvation         |
| GO:0006760        | 5.9E-03        | 9               | folic acid-containing compound metabolic process |
| <b>GO:0010252</b> | <b>6.5E-03</b> | <b>5</b>        | <b>auxin homeostasis</b>                         |
| GO:0035295        | 9.2E-03        | 25              | tube development                                 |
| GO:0006826        | 2.2E-02        | 12              | iron ion transport                               |
| GO:0014070        | 3.1E-02        | 13              | response to organic cyclic compound              |
| GO:0010583        | 3.1E-02        | 13              | response to cyclopentenone                       |
| GO:0009739        | 3.4E-02        | 14              | response to gibberellin                          |
| GO:0043069        | 3.9E-02        | 14              | negative regulation of programmed cell death     |
| GO:0015837        | 4.2E-02        | 20              | amine transport                                  |
| GO:0065008        | 4.3E-02        | 94              | regulation of biological quality                 |

533



534 **Table 2.** Primer list

| Name                    | Gene reference | Used for | Primer sequence (5'-3')*                                                                                                         |
|-------------------------|----------------|----------|----------------------------------------------------------------------------------------------------------------------------------|
| Promoter<br><i>DD25</i> | AT3G04540      | Cloning  | <u>GGGGACAAGTTTGTACAAAAAAGCAGGCTGAGCTCCTTCTACGTTTTGTCACTA</u><br><u>GGGGACCACTTTGTACAAGAAAGCTGGGTACTAGTAGACAACGAAGCAGCCATTAT</u> |
| <i>GH3.3</i>            | AT2G23170      | Cloning  | <u>GGGGACAAGTTTGTACAAAAAAGCAGGCTCACGATCGAGCAAACGAA</u><br><u>GGGGACCACTTTGTACAAGAAAGCTGGGTATCAACGGTCATGATTAATAATGGT</u>          |
| <i>PP2A</i>             | AT1G69960      | qPCR     | TAACGTGGCCAAAATGATGC<br>GTTCTCCACAACCGCTTGGT                                                                                     |
| <i>PHE1</i>             | AT1G65330      | qPCR     | TCCAACACCGAAAACCTCCAT<br>CGCATGTGCGGTCATCC                                                                                       |
| <i>AGL62</i>            | AT5G60440      | qPCR     | CCTCCTCACCAACACAACAA<br>ACCTTTGAACCCCTCGAGTT                                                                                     |
| <i>AGL36</i>            | AT5G26650      | qPCR     | GTGCTCTCATCTACAGTCCA<br>CATCATCTTCTTGGTTCGGG                                                                                     |
| <i>PEG2</i>             | AT1G49290      | qPCR     | GGAAGTGATAGAAGCGGTAGAG<br>TAAACCTCGCACTCACAATCTC                                                                                 |
| <i>PEG9</i>             | At5g15140      | qPCR     | ACAACAAGACGACGAATAATCTG<br>GCATACCTTAGTAGCAAACCG                                                                                 |
| <i>ADM</i>              | AT4G11940      | qPCR     | TTGAAAGAGTTTGCGGATGTG<br>AGGACCAACATTATGGTCATACC                                                                                 |

535 \*primer adaptors are underlined

536
